# Supplementary material for: Multi-Trait GWAS and New Candidate Genes Annotation for Growth Curve Parameters in Brahman Cattle
Source: PubMed Central journal article supplement (PMC4622042; doi:10.1371/journal.pone.0139906), 2015-10-07
Supplement: pone.0139906.s006.pdf [file pone.0139906.s006.pdf]

**S1 Table. Table listing markers with no strong linkage disequilibrium (LD) with other markers and its nearest genes for each chromosome associated to mature weight (A). Markers were sorted by chromosome and then *P*-value and so the table summarizes the most significant SNPs with no strong LD for each chromosome**

| Markers                        | Chr | pvala      | Position  | Chr_start | Chr_stop  | Feature_name | Distance | %Var       |
|--------------------------------|-----|------------|-----------|-----------|-----------|--------------|----------|------------|
| BovineHD0200032095             | 2   | 0.00015114 | 111355325 | 111309377 | 111347961 | LOC618198    | 7364     | 0.47500087 |
| BovineHD0200033231             | 2   | 0.00021635 | 115139245 | 115124265 | 115156084 | LOC518699    | 0        | 0.43087413 |
| BovineHD0200032094             | 2   | 0.00021802 | 111354445 | 111309377 | 111347961 | LOC618198    | 6484     | 0.44546294 |
| BovineHD0200032097             | 2   | 0.00021802 | 111358765 | 111309377 | 111347961 | LOC618198    | 10804    | 0.44546294 |
| ARS-BFGL-NGS-118904            | 2   | 0.00035589 | 53951533  | 54147528  | 54248399  | LOC782540    | 195995   | 0.46604181 |
| Hapmap35744-SCAFFOLD60587_8279 | 2   | 0.00075341 | 111361143 | 111309377 | 111347961 | LOC618198    | 13182    | 0.37263542 |
| BovineHD0200015359             | 2   | 0.00089504 | 53915714  | 54147528  | 54248399  | LOC782540    | 231814   | 0.41055928 |
| BovineHD0300016037             | 3   | 6.66E-05   | 53158505  | 53205967  | 53257297  | SH3GLB1      | 47462    | 1.04138335 |
| BovineHD0300009685             | 3   | 0.00082783 | 30778559  | 30800991  | 30802100  | LOC539739    | 22432    | 0.38843028 |
| BovineHD0400007804             | 4   | 5.13E-05   | 26988234  | 26698950  | 26708119  | LOC783441    | 280115   | 0.49949804 |
| BovineHD0400007849             | 4   | 5.13E-05   | 27135030  | 27280043  | 27280537  | LOC538985    | 145013   | 0.49949804 |
| BovineHD0400008013             | 4   | 5.13E-05   | 27568744  | 27448443  | 28024227  | LOC535415    | 0        | 1.82376906 |
| BovineHD0400009420             | 4   | 5.13E-05   | 33197944  | 33225289  | 33366637  | LOC781830    | 27345    | 1.98851301 |
| BTB-01114756                   | 4   | 5.13E-05   | 27560851  | 27448443  | 28024227  | LOC535415    | 0        | 0.6656463  |
| BovineHD0400034063             | 4   | 9.75E-05   | 117064985 | 110843368 | 110870369 | LOC520408    | 6194616  | 0.43391181 |
| BovineHD4100002757             | 4   | 0.00014143 | 30202937  | 30365441  | 30433571  | LOC523019    | 162504   | 0.45978267 |
| BovineHD0400034397             | 4   | 0.00016103 | 117668183 | 110843368 | 110870369 | LOC520408    | 6797814  | 0.32829866 |
| BovineHD0400034928             | 4   | 0.00025699 | 119234224 | 110843368 | 110870369 | LOC520408    | 8363855  | 0.46917421 |
| Hapmap54229-rs29017613         | 4   | 0.00036594 | 30200987  | 30365441  | 30433571  | LOC523019    | 164454   | 0.46186836 |
| BovineHD0400034134             | 4   | 0.00044052 | 117215749 | 110843368 | 110870369 | LOC520408    | 6345380  | 0.46143981 |
| BovineHD0400034145             | 4   | 0.00044052 | 117240334 | 110843368 | 110870369 | LOC520408    | 6369965  | 0.46143981 |
| BovineHD0400008147             | 4   | 0.0008611  | 28288554  | 28331833  | 28510179  | LOC618384    | 43279    | 0.34810785 |
| BovineHD0500006477             | 5   | 4.52E-06   | 22373212  | 22559940  | 22562652  | BTG1         | 186728   | 1.28172538 |
| BovineHD0500006481             | 5   | 4.52E-06   | 22388982  | 22559940  | 22562652  | BTG1         | 170958   | 1.28172538 |
| BovineHD0500032881             | 5   | 0.00050233 | 113878281 | 113885881 | 113894615 | LOC789821    | 7600     | 1.33813115 |
| BovineHD0500023351             | 5   | 0.00052417 | 82607562  | 82292908  | 82310569  | MGC137384    | 296993   | 0.45087779 |

|                        |   |            |           |           |           |           |         |            |
|------------------------|---|------------|-----------|-----------|-----------|-----------|---------|------------|
| BovineHD0500023371     | 5 | 0.00052417 | 82640169  | 82292908  | 82310569  | MGC137384 | 329600  | 0.45087779 |
| BovineHD0500023380     | 5 | 0.00052417 | 82652835  | 82292908  | 82310569  | MGC137384 | 342266  | 0.45087779 |
| BovineHD0500023383     | 5 | 0.00052417 | 82662475  | 82292908  | 82310569  | MGC137384 | 351906  | 0.45087779 |
| BovineHD0500023373     | 5 | 0.00072325 | 82643997  | 82292908  | 82310569  | MGC137384 | 333428  | 0.45717603 |
| BovineHD0500023411     | 5 | 0.00072932 | 82754564  | 82292908  | 82310569  | MGC137384 | 443995  | 0.43796097 |
| BovineHD0500005741     | 5 | 0.00077129 | 19806551  | 19763156  | 19788394  | KITLG     | 18157   | 1.138398   |
| BovineHD0500006162     | 5 | 0.00077129 | 21362355  | 21216198  | 21324755  | LOC782975 | 37600   | 1.138398   |
| BovineHD0500006167     | 5 | 0.00077129 | 21367655  | 21216198  | 21324755  | LOC782975 | 42900   | 1.138398   |
| BovineHD0500006182     | 5 | 0.00077129 | 21415740  | 21216198  | 21324755  | LOC782975 | 90985   | 1.138398   |
| BovineHD0500023546     | 5 | 0.00080975 | 83165869  | 83580272  | 83581359  | LOC541057 | 414403  | 0.46851666 |
| BovineHD0500023376     | 5 | 0.00091239 | 82648706  | 82292908  | 82310569  | MGC137384 | 338137  | 0.4462513  |
| BovineHD0600027188     | 6 | 9.79E-08   | 97907606  | 97851185  | 97854333  | IL2       | 53273   | 1.53578042 |
| BovineHD0600027517     | 6 | 1.32E-06   | 98915874  | 98809532  | 98824808  | MGC127281 | 91066   | 0.75954816 |
| BovineHD0600027518     | 6 | 1.32E-06   | 98921247  | 98809532  | 98824808  | MGC127281 | 96439   | 0.75954816 |
| BovineHD0600027520     | 6 | 1.32E-06   | 98924679  | 98809532  | 98824808  | MGC127281 | 99871   | 0.75954816 |
| BTB-01204750           | 6 | 2.91E-06   | 13417489  | 13210891  | 13211865  | LOC785498 | 205624  | 1.31825597 |
| Hapmap32223-BTC-044639 | 6 | 4.20E-06   | 102215038 | 102478990 | 102566753 | LOC614799 | 263952  | 0.77785153 |
| BovineHD0600027170     | 6 | 5.53E-06   | 97859333  | 97851185  | 97854333  | IL2       | 5000    | 0.55720457 |
| BovineHD0600027507     | 6 | 9.74E-06   | 98896708  | 98809532  | 98824808  | MGC127281 | 71900   | 0.6182961  |
| BovineHD0600027154     | 6 | 1.97E-05   | 97789599  | 97851185  | 97854333  | IL2       | 61586   | 0.50895535 |
| BovineHD0600028652     | 6 | 2.37E-05   | 102886663 | 102911068 | 103023999 | LOC517240 | 24405   | 0.72556314 |
| BovineHD0600028665     | 6 | 2.37E-05   | 102944964 | 102911068 | 103023999 | LOC517240 | 0       | 0.71143623 |
| ARS-BFGL-NGS-26389     | 6 | 3.16E-05   | 101096589 | 101230402 | 101230554 | LOC785939 | 133813  | 0.77172786 |
| BovineHD0600028633     | 6 | 4.42E-05   | 102840357 | 102738182 | 102865778 | MGC142642 | 0       | 0.47414487 |
| BovineHD0600028676     | 6 | 5.32E-05   | 102991379 | 102911068 | 103023999 | LOC517240 | 0       | 0.6364964  |
| BTA-121434-no-rs       | 6 | 6.22E-05   | 100428424 | 100742310 | 100755654 | LOC785837 | 313886  | 0.57788249 |
| BovineHD0600032353     | 6 | 7.56E-05   | 114176857 | 110935645 | 111033198 | MGC128932 | 3143659 | 0.57143111 |
| BovineHD0600032342     | 6 | 8.23E-05   | 114156474 | 110935645 | 111033198 | MGC128932 | 3123276 | 0.59638995 |
| BovineHD0600030324     | 6 | 8.92E-05   | 107618872 | 107605618 | 107619569 | LOC504957 | 0       | 0.70134148 |
| BovineHD0600032427     | 6 | 9.76E-05   | 114436483 | 110935645 | 111033198 | MGC128932 | 3403285 | 0.67811755 |
| BovineHD4100005507     | 6 | 0.00011905 | 102790401 | 102738182 | 102865778 | MGC142642 | 0       | 0.4356367  |

|                    |   |            |           |           |           |           |         |            |
|--------------------|---|------------|-----------|-----------|-----------|-----------|---------|------------|
| BovineHD0600032313 | 6 | 0.00016332 | 114098001 | 110935645 | 111033198 | MGC128932 | 3064803 | 0.5894787  |
| BovineHD0600011495 | 6 | 0.00017784 | 42277712  | 42172542  | 42274983  | MGC140504 | 2729    | 0.43314805 |
| ARS-BFGL-NGS-71333 | 6 | 0.00017968 | 89075993  | 88374935  | 88921637  | ARHGAP24  | 154356  | 0.41884506 |
| BovineHD0600031012 | 6 | 0.0001878  | 110151219 | 110147359 | 110172120 | LOC782761 | 0       | 0.60386413 |
| BovineHD0600011787 | 6 | 0.00020596 | 43433730  | 43379453  | 43490213  | MGC128782 | 0       | 0.68426294 |
| BovineHD0600025472 | 6 | 0.0002282  | 92705860  | 92427336  | 92458278  | SLC10A6   | 247582  | 0.27196106 |
| BovineHD0600025838 | 6 | 0.0002282  | 93393456  | 93379108  | 93418563  | LOC539372 | 0       | 0.27196106 |
| BovineHD0600028183 | 6 | 0.00025662 | 100929172 | 100757430 | 100793611 | MGC142451 | 135561  | 0.58635883 |
| BovineHD0600028705 | 6 | 0.00029303 | 103102344 | 103033235 | 103089693 | LOC519695 | 12651   | 0.42737757 |
| BovineHD0600011756 | 6 | 0.00030444 | 43368544  | 43379453  | 43490213  | MGC128782 | 10909   | 0.71797462 |
| BovineHD0600011759 | 6 | 0.00030444 | 43374796  | 43379453  | 43490213  | MGC128782 | 4657    | 0.71797462 |
| BovineHD0600011775 | 6 | 0.00030444 | 43402739  | 43379453  | 43490213  | MGC128782 | 0       | 0.71797462 |
| BovineHD4100005509 | 6 | 0.00036122 | 102793498 | 102738182 | 102865778 | MGC142642 | 0       | 0.39500865 |
| BovineHD0600032432 | 6 | 0.00039493 | 114454346 | 110935645 | 111033198 | MGC128932 | 3421148 | 0.43595933 |
| BovineHD0600027161 | 6 | 0.00039846 | 97813656  | 97851185  | 97854333  | IL2       | 37529   | 0.4814652  |
| BovineHD0600026979 | 6 | 0.00040361 | 97178687  | 97145283  | 97214148  | LOC783930 | 0       | 0.5715323  |
| BovineHD0600027030 | 6 | 0.00040835 | 97314118  | 97258057  | 97299086  | MGC127353 | 15032   | 0.35908327 |
| BovineHD0600025830 | 6 | 0.0004532  | 93368113  | 93354518  | 93371616  | CCDC98    | 0       | 0.24723032 |
| BovineHD0600032318 | 6 | 0.00052018 | 114116979 | 110935645 | 111033198 | MGC128932 | 3083781 | 0.48370953 |
| BovineHD0600032358 | 6 | 0.00058042 | 114193732 | 110935645 | 111033198 | MGC128932 | 3160534 | 0.51502728 |
| BovineHD0600019898 | 6 | 0.0009009  | 71449954  | 71244398  | 71818706  | LEC3      | 0       | 0.38027543 |
| BovineHD0600030287 | 6 | 0.00091154 | 107538017 | 107516063 | 107541102 | LOC505477 | 0       | 0.53282646 |
| BovineHD0600030313 | 6 | 0.00091154 | 107607570 | 107605618 | 107619569 | LOC504957 | 0       | 0.53282646 |
| BovineHD0600027033 | 6 | 0.0009781  | 97316958  | 97258057  | 97299086  | MGC127353 | 17872   | 0.34515742 |
| BovineHD0800020555 | 8 | 2.24E-05   | 68473880  | 68417099  | 68530970  | LOC532684 | 0       | 0.8454201  |
| BovineHD0800024309 | 8 | 0.00015462 | 81841082  | 81741733  | 81790423  | LOC781205 | 50659   | 0.29115993 |
| BTB-00362255       | 8 | 0.00015462 | 81866074  | 81741733  | 81790423  | LOC781205 | 75651   | 0.29115993 |
| BovineHD0800024222 | 8 | 0.00036377 | 81537751  | 81413255  | 81449593  | LOC538667 | 88158   | 0.49912374 |
| BovineHD0800004640 | 8 | 0.00043759 | 14831058  | 14720502  | 14829375  | LOC785941 | 1683    | 0.65822781 |
| BovineHD0800004667 | 8 | 0.00043759 | 14919451  | 14997823  | 15003175  | LOC786143 | 78372   | 0.65822781 |
| BovineHD0800004669 | 8 | 0.00043759 | 14925557  | 14997823  | 15003175  | LOC786143 | 72266   | 0.65822781 |

|                      |    |            |          |          |          |           |         |            |
|----------------------|----|------------|----------|----------|----------|-----------|---------|------------|
| BovineHD0800004670   | 8  | 0.00043759 | 14927629 | 14997823 | 15003175 | LOC786143 | 70194   | 0.65822781 |
| BovineHD0800004694   | 8  | 0.00043759 | 15022993 | 15034413 | 15105042 | MGC133601 | 11420   | 0.65822781 |
| BovineHD0800018125   | 8  | 0.00050776 | 60719561 | 60665163 | 60668611 | LOC786270 | 50950   | 0.56204591 |
| BovineHD0800018155   | 8  | 0.00050776 | 60789911 | 60665163 | 60668611 | LOC786270 | 121300  | 0.56204591 |
| BovineHD0800005595   | 8  | 0.00059102 | 17873442 | 18379284 | 18639897 | LOC786878 | 505842  | 1.19077782 |
| BovineHD0800005603   | 8  | 0.00059102 | 17898087 | 18379284 | 18639897 | LOC786878 | 481197  | 1.07226708 |
| BovineHD0800016657   | 8  | 0.00065653 | 55223436 | 55152915 | 55245002 | LOC512888 | 0       | 0.55217624 |
| BovineHD0800003847   | 8  | 0.00077129 | 11755496 | 11418713 | 11422744 | LOC783420 | 332752  | 0.91119899 |
| BovineHD0800020836   | 8  | 0.00077129 | 69336118 | 69363553 | 69400275 | WDR40A    | 27435   | 0.45608008 |
| BovineHD0900021870   | 9  | 0.00014693 | 78450681 | 78466302 | 78648155 | LOC535975 | 15621   | 0.83783394 |
| BovineHD0900021873   | 9  | 0.00014693 | 78460717 | 78466302 | 78648155 | LOC535975 | 5585    | 0.83783394 |
| BovineHD1000000261   | 10 | 0.00030061 | 890364   | 792166   | 803266   | LOC785663 | 87098   | 0.78666221 |
| BovineHD1100001456   | 11 | 9.77E-05   | 3990896  | 3960714  | 4017307  | LOC536340 | 0       | 0.61707861 |
| BovineHD1100004656   | 11 | 0.00044567 | 14260840 | 14257232 | 14269244 | LOC511001 | 0       | 0.43659509 |
| BovineHD1100009735   | 11 | 0.00045305 | 32353685 | 32398354 | 32398725 | LOC781388 | 44669   | 0.38654677 |
| BovineHD1100001449   | 11 | 0.0007288  | 3962378  | 3960714  | 4017307  | LOC536340 | 0       | 0.34484303 |
| BovineHD1100014200   | 11 | 0.0007957  | 48397856 | 48344048 | 48636034 | LOC538058 | 0       | 0.36247394 |
| BovineHD1100014202   | 11 | 0.0007957  | 48399883 | 48344048 | 48636034 | LOC538058 | 0       | 0.36247394 |
| BovineHD1100022797   | 11 | 0.00091135 | 79514927 | 79212034 | 79212441 | LOC788469 | 302486  | 0.38659959 |
| BovineHD1200011359   | 12 | 0.00018187 | 39953697 | 40432286 | 40432651 | LOC789001 | 478589  | 0.56395312 |
| BovineHD1200011989   | 12 | 0.00047293 | 42760473 | 42701798 | 42932277 | LOC524913 | 0       | 0.37993616 |
| BovineHD1200001981   | 12 | 0.00071777 | 6914353  | 7191123  | 7193153  | LOC786945 | 276770  | 0.23144934 |
| BovineHD1200002015   | 12 | 0.00071777 | 7086000  | 7191123  | 7193153  | LOC786945 | 105123  | 0.46216664 |
| BovineHD1300004807   | 13 | 0.0009638  | 16852876 | 16826246 | 16849176 | LOC512694 | 3700    | 0.83076982 |
| BTA-05407-rs29019567 | 15 | 0.00054602 | 20610552 | 20674135 | 20684338 | LOC615090 | 63583   | 0.42255197 |
| BovineHD1600021941   | 16 | 0.00082762 | 76187883 | 72823891 | 72834138 | LOC509797 | 3353745 | 0.50188827 |
| BovineHD1600021942   | 16 | 0.00082762 | 76195207 | 72823891 | 72834138 | LOC509797 | 3361069 | 0.50188827 |
| BovineHD1600021944   | 16 | 0.00082762 | 76200952 | 72823891 | 72834138 | LOC509797 | 3366814 | 0.50188827 |
| BovineHD1700013129   | 17 | 0.00018946 | 46928941 | 46685030 | 46934790 | LOC540363 | 0       | 0.59646967 |
| BovineHD1700000867   | 17 | 0.00098419 | 3656789  | 3641911  | 3650486  | SFRP2     | 6303    | 0.46014539 |
| ARS-BFGL-NGS-19022   | 18 | 6.73E-06   | 65551047 | 62889251 | 62891477 | LOC790330 | 2659570 | 1.09716435 |

|                    |    |            |          |          |          |           |         |            |
|--------------------|----|------------|----------|----------|----------|-----------|---------|------------|
| BovineHD1800013712 | 18 | 0.00027609 | 46597873 | 46568328 | 46582017 | LOC521171 | 15856   | 0.53817642 |
| BovineHD1800009739 | 18 | 0.0005343  | 32239978 | 32230082 | 32269399 | ATP6D     | 0       | 0.49691078 |
| BovineHD1800018806 | 18 | 0.00097231 | 64768873 | 62889251 | 62891477 | LOC790330 | 1877396 | 0.29958816 |
| BovineHD1900017112 | 19 | 9.10E-06   | 59917525 | 60076935 | 60086036 | LOC787823 | 159410  | 0.39572451 |
| BovineHD1900001049 | 19 | 0.0001571  | 4407360  | 3992700  | 4143802  | LOC781740 | 263558  | 0.81062732 |
| BovineHD4100014346 | 19 | 0.00029976 | 57020892 | 56938203 | 57025786 | LOC789737 | 0       | 0.43813463 |
| BovineHD1900017042 | 19 | 0.00035442 | 59664174 | 60076935 | 60086036 | LOC787823 | 412761  | 0.51197017 |
| BovineHD1900017051 | 19 | 0.00035442 | 59705455 | 60076935 | 60086036 | LOC787823 | 371480  | 0.51197017 |
| BovineHD1900017056 | 19 | 0.00035442 | 59740822 | 60076935 | 60086036 | LOC787823 | 336113  | 0.51197017 |
| BovineHD1900017058 | 19 | 0.00035442 | 59745154 | 60076935 | 60086036 | LOC787823 | 331781  | 0.51197017 |
| BovineHD1900017026 | 19 | 0.00055158 | 59614413 | 59161156 | 59163432 | LOC790129 | 450981  | 0.32002279 |
| BovineHD1900018660 | 19 | 0.00067282 | 9006976  | 8974082  | 9194966  | LOC537257 | 0       | 0.44396043 |
| BovineHD2000001917 | 20 | 2.91E-06   | 6034518  | 6022661  | 6023433  | LOC783392 | 11085   | 1.31825597 |
| BovineHD2000009323 | 20 | 0.00043754 | 32481431 | 32421715 | 32542203 | LOC535804 | 0       | 0.69385379 |
| BovineHD2100001787 | 21 | 2.91E-06   | 8181149  | 8178786  | 8320248  | LOC407231 | 0       | 0.87930059 |
| BovineHD2100000447 | 21 | 8.95E-05   | 3016617  | 2907014  | 3132629  | LOC510723 | 0       | 0.68517099 |
| BovineHD2200017289 | 22 | 8.76E-05   | 59571549 | 59524064 | 59527996 | LOC617772 | 43553   | 0.88089923 |
| BovineHD2200000864 | 22 | 0.00010653 | 3194730  | 3414073  | 3505940  | LOC535376 | 219343  | 0.61770325 |
| BovineHD2200013732 | 22 | 0.00018848 | 47701782 | 47635366 | 47708278 | LOC785746 | 0       | 0.75084072 |
| BovineHD2200016462 | 22 | 0.00049046 | 57103659 | 57109237 | 57171804 | LOC519899 | 5578    | 0.48764421 |
| BovineHD2200012819 | 22 | 0.00079838 | 44370842 | 43492256 | 44563593 | LOC537173 | 0       | 0.79571041 |
| BovineHD2200013582 | 22 | 0.00079838 | 47271241 | 47273183 | 47295840 | LOC783987 | 1942    | 0.68239779 |
| BTB-00848517       | 22 | 0.00079838 | 44430993 | 43492256 | 44563593 | LOC537173 | 0       | 0.79571041 |
| BovineHD2300009168 | 23 | 2.15E-05   | 31762663 | 31688831 | 31691301 | SOX4      | 71362   | 0.99524106 |
| BovineHD2300009172 | 23 | 2.15E-05   | 31778851 | 31688831 | 31691301 | SOX4      | 87550   | 0.99524106 |
| BovineHD2300001341 | 23 | 3.50E-05   | 5584389  | 5474689  | 5585785  | LOC618855 | 0       | 0.64884986 |
| BovineHD2300009167 | 23 | 0.00014561 | 31747290 | 31688831 | 31691301 | SOX4      | 55989   | 0.8098724  |
| BovineHD2300001187 | 23 | 0.00041268 | 5025076  | 5022572  | 5028461  | BOLA-DYA  | 0       | 0.5204639  |
| BovineHD2300011460 | 23 | 0.00045433 | 39654679 | 39628234 | 39920734 | MGC151783 | 0       | 0.45199863 |
| BovineHD2300001338 | 23 | 0.00056928 | 5575255  | 5474689  | 5585785  | LOC618855 | 0       | 0.36511824 |
| BovineHD2300005631 | 23 | 0.00093845 | 21402035 | 21369764 | 21399894 | LOC786695 | 2141    | 0.50038524 |

|                    |    |            |          |          |          |           |        |            |
|--------------------|----|------------|----------|----------|----------|-----------|--------|------------|
| BovineHD2400010368 | 24 | 2.91E-06   | 37816668 | 37863264 | 37864256 | LOC786975 | 46596  | 0.43988193 |
| BovineHD2700000762 | 27 | 2.91E-06   | 2279279  | 2307555  | 2308325  | LOC517971 | 28276  | 0.43988193 |
| BovineHD2700000770 | 27 | 2.91E-06   | 2306884  | 2307555  | 2308325  | LOC517971 | 671    | 0.43988193 |
| BovineHD2700000774 | 27 | 2.91E-06   | 2331788  | 2307555  | 2308325  | LOC517971 | 23463  | 0.43988193 |
| BovineHD2700000775 | 27 | 2.91E-06   | 2339835  | 2307555  | 2308325  | LOC517971 | 31510  | 0.43988193 |
| BovineHD2700011135 | 27 | 0.00029629 | 38582346 | 38304464 | 38352009 | LOC787377 | 230337 | 0.35406176 |
| BovineHD2700011124 | 27 | 0.00029815 | 38534442 | 38304464 | 38352009 | LOC787377 | 182433 | 0.33465188 |
| BovineHD2700012060 | 27 | 0.00037578 | 41551568 | 41172444 | 41289736 | LOC784356 | 261832 | 0.37012178 |
| BovineHD2700010770 | 27 | 0.00047067 | 37447990 | 37181818 | 37560782 | LOC531459 | 0      | 0.38247737 |
| BovineHD2700004261 | 27 | 0.00050401 | 14650855 | 14560219 | 14653912 | LOC790088 | 0      | 0.43243618 |
| BovineHD2700012073 | 27 | 0.0005194  | 41618491 | 41172444 | 41289736 | LOC784356 | 328755 | 0.43069712 |
| BovineHD2700010776 | 27 | 0.00066828 | 37470446 | 37181818 | 37560782 | LOC531459 | 0      | 0.36162767 |
| BovineHD2700011611 | 27 | 0.00076589 | 40047751 | 40139624 | 40621183 | LOC784326 | 91873  | 0.38563058 |
| BovineHD2700011842 | 27 | 0.00076589 | 40780949 | 40139624 | 40621183 | LOC784326 | 159766 | 0.38563058 |
| BovineHD3000019003 | 30 | 0.00029678 | 65152485 | 65270083 | 65270590 | LOC784159 | 117598 | 0.21897076 |
| BovineHD3000019030 | 30 | 0.00029678 | 65221973 | 65270083 | 65270590 | LOC784159 | 48110  | 0.21897076 |
| BovineHD3000046685 | 30 | 0.0008286  | 64847319 | 64815965 | 64823638 | APEX2     | 23681  | 0.18399554 |
