# Supplementary material for: Multi-Trait GWAS and New Candidate Genes Annotation for Growth Curve Parameters in Brahman Cattle
Source: PubMed Central journal article supplement (PMC4622042; doi:10.1371/journal.pone.0139906), 2015-10-07
Supplement: pone.0139906.s007.pdf [file pone.0139906.s007.pdf]

**S2 Table. Table listing markers with no strong linkage disequilibrium (LD) with other markers and its nearest genes for each chromosome associated to maturity rate (K). Markers were sorted by chromosome and then *P*-value and so the table summarizes the most significant SNPs with no strong LD for each chromosome**

| Markers            | Chr | pvalk       | Position  | Chr_start | Chr_stop  | Feature_name | Distance | % Var      |
|--------------------|-----|-------------|-----------|-----------|-----------|--------------|----------|------------|
| BovineHD0100011757 | 1   | 4.29E-05    | 41233947  | 41326013  | 41409064  | LOC781270    | 92066    | 0.52876136 |
| BovineHD0100008623 | 1   | 0.000124803 | 29084731  | 28787675  | 28787935  | LOC781386    | 296796   | 0.3649257  |
| BovineHD0100044544 | 1   | 0.000164868 | 153050619 | 146046628 | 146050938 | TMEM18       | 6999681  | 0.3266512  |
| BovineHD0100044549 | 1   | 0.000164868 | 153056651 | 146046628 | 146050938 | TMEM18       | 7005713  | 0.3266512  |
| BovineHD0100008628 | 1   | 0.000190022 | 29097600  | 28787675  | 28787935  | LOC781386    | 309665   | 0.33715577 |
| BovineHD0100015793 | 1   | 0.000270589 | 56125570  | 55682802  | 55683963  | LOC781645    | 441607   | 0.31311612 |
| BovineHD0100008629 | 1   | 0.000369157 | 29098485  | 28787675  | 28787935  | LOC781386    | 310550   | 0.31318547 |
| BovineHD0100033663 | 1   | 0.000436224 | 119188091 | 119117039 | 119157083 | LOC539843    | 31008    | 0.27232588 |
| ARS-BFGL-BAC-16186 | 1   | 0.000541242 | 157395805 | 146046628 | 146050938 | TMEM18       | 11344867 | 0.3340821  |
| BovineHD0100046943 | 1   | 0.000822347 | 31496031  | 31490853  | 31495762  | LOC790863    | 269      | 0.27108213 |
| BovineHD0100009290 | 1   | 0.000859598 | 32059968  | 32138605  | 32221912  | LOC613799    | 78637    | 0.24482289 |
| BovineHD0200036282 | 2   | 2.50E-05    | 124919532 | 124853361 | 124923186 | MGC139675    | 0        | 0.49780729 |
| BovineHD0200001042 | 2   | 4.61E-05    | 3904111   | 3895689   | 3907731   | LOC782818    | 0        | 0.40647095 |
| BovineHD0200029813 | 2   | 7.46E-05    | 103686803 | 103535205 | 103811354 | LOC615765    | 0        | 0.93708227 |
| BovineHD0200037821 | 2   | 0.000455093 | 130161730 | 125773468 | 125794102 | LOC616377    | 4367628  | 0.49378086 |
| BovineHD0200035678 | 2   | 0.00060923  | 123045219 | 123015389 | 123032153 | LOC789096    | 13066    | 0.43103756 |
| BovineHD0200029833 | 2   | 0.000636795 | 103746725 | 103535205 | 103811354 | LOC615765    | 0        | 0.45246459 |
| BovineHD0200027147 | 2   | 0.000732272 | 94542687  | 94337227  | 94728448  | LOC782360    | 0        | 0.24482496 |
| BovineHD0200027159 | 2   | 0.000732272 | 94557690  | 94337227  | 94728448  | LOC782360    | 0        | 0.24482496 |
| BovineHD0200007282 | 2   | 0.000896404 | 25344654  | 25523332  | 25581013  | LOC540766    | 178678   | 0.30949236 |
| BovineHD0200001550 | 2   | 0.000918976 | 5354593   | 5156851   | 5176584   | LOC786192    | 178009   | 0.32414999 |
| BovineHD0300005371 | 3   | 2.76E-05    | 16503436  | 16482571  | 16493504  | S100A10      | 9932     | 1.3095062  |
| BovineHD0300001240 | 3   | 5.87E-05    | 3991918   | 3975382   | 3996648   | LOC508183    | 0        | 0.48408682 |
| BovineHD0300011554 | 3   | 0.000259163 | 37226889  | 37050029  | 37050432  | LOC787616    | 176457   | 0.34680662 |
| BovineHD0300011598 | 3   | 0.000852979 | 37411646  | 37495596  | 37496010  | LOC787637    | 83950    | 0.3059741  |
| INRA-453           | 3   | 0.000862051 | 19248260  | 19249447  | 19252795  | LOC518825    | 1187     | 0.35534866 |
| BovineHD0400031190 | 4   | 1.67E-05    | 108975638 | 108994462 | 108995968 | LOC614377    | 18824    | 0.40581231 |

|                    |   |             |           |           |           |           |         |            |
|--------------------|---|-------------|-----------|-----------|-----------|-----------|---------|------------|
| BovineHD0400031404 | 4 | 0.00038413  | 109727854 | 109593798 | 109672415 | LOC512582 | 55439   | 0.31394745 |
| BovineHD0400005433 | 4 | 0.000464613 | 18168180  | 18113694  | 18587211  | LOC517284 | 0       | 0.30480253 |
| BovineHD0400034063 | 4 | 0.000499149 | 117064985 | 110843368 | 110870369 | LOC520408 | 6194616 | 0.25806934 |
| BovineHD0400031871 | 4 | 0.000711273 | 111101754 | 110843368 | 110870369 | LOC520408 | 231385  | 0.23728594 |
| BovineHD0400028185 | 4 | 0.000752304 | 100615708 | 99955990  | 100382392 | LOC788066 | 233316  | 0.33893054 |
| BovineHD0400010516 | 4 | 0.000813287 | 37502618  | 37572976  | 37707766  | LOC537777 | 70358   | 0.31920266 |
| BovineHD0400031372 | 4 | 0.000876091 | 109633108 | 109593798 | 109672415 | LOC512582 | 0       | 0.30999133 |
| BovineHD0500036248 | 5 | 5.87E-05    | 105051999 | 104992297 | 105054740 | LOC615834 | 0       | 0.3808224  |
| BovineHD4100004090 | 5 | 9.98E-05    | 110251486 | 110119934 | 110358740 | LOC509011 | 0       | 0.4362621  |
| BovineHD0500032843 | 5 | 0.0001055   | 113726014 | 113716432 | 113731138 | LOC790892 | 0       | 0.55246201 |
| BovineHD0500032844 | 5 | 0.0001055   | 113730594 | 113716432 | 113731138 | LOC790892 | 0       | 0.55246201 |
| BovineHD0500029899 | 5 | 0.000107182 | 104496844 | 104415828 | 104438717 | MGC142404 | 58127   | 0.45913916 |
| ARS-BFGL-NGS-42687 | 5 | 0.00012728  | 105288314 | 105223293 | 105412829 | LOC540132 | 0       | 0.41113519 |
| BovineHD0500017023 | 5 | 0.00017578  | 60721425  | 60846730  | 60888845  | LOC539655 | 125305  | 0.54969866 |
| BovineHD0500031339 | 5 | 0.000209059 | 108793263 | 108766083 | 108812776 | LOC535381 | 0       | 0.49518029 |
| BovineHD0500031342 | 5 | 0.000209059 | 108803665 | 108766083 | 108812776 | LOC535381 | 0       | 0.49518029 |
| BovineHD0500029906 | 5 | 0.000252874 | 104548821 | 104415828 | 104438717 | MGC142404 | 110104  | 0.46652934 |
| BovineHD0500019552 | 5 | 0.00027441  | 69831255  | 69928146  | 69931199  | MGC137188 | 96891   | 0.32477711 |
| BovineHD0500019556 | 5 | 0.00027441  | 69841335  | 69928146  | 69931199  | MGC137188 | 86811   | 0.32477711 |
| BovineHD0500019572 | 5 | 0.00027441  | 69885003  | 69928146  | 69931199  | MGC137188 | 43143   | 0.32477711 |
| BovineHD0500019575 | 5 | 0.00027441  | 69894023  | 69928146  | 69931199  | MGC137188 | 34123   | 0.32477711 |
| BovineHD0500031445 | 5 | 0.000376375 | 109149853 | 109149240 | 109159647 | JOSD1     | 0       | 0.4570919  |
| BovineHD0500032584 | 5 | 0.000438131 | 112839060 | 112609746 | 112832121 | LOC523518 | 6939    | 0.41761513 |
| BovineHD0500017160 | 5 | 0.000660686 | 61262958  | 61257822  | 62047789  | LOC516896 | 0       | 0.39315005 |
| BovineHD0600013748 | 6 | 0.000251628 | 49942445  | 51163313  | 51263216  | LOC781512 | 1220868 | 0.40124513 |
| BovineHD0600001316 | 6 | 0.000291331 | 4994214   | 4877795   | 4878609   | LOC781502 | 115605  | 0.26647554 |
| BovineHD0600001303 | 6 | 0.000364399 | 4942854   | 4877795   | 4878609   | LOC781502 | 64245   | 0.30796532 |
| BovineHD0600001333 | 6 | 0.000386404 | 5065951   | 4877795   | 4878609   | LOC781502 | 187342  | 0.25475438 |
| BovineHD0600001335 | 6 | 0.000386404 | 5071197   | 4877795   | 4878609   | LOC781502 | 192588  | 0.25475438 |
| BovineHD0600001286 | 6 | 0.000417167 | 4876731   | 4877795   | 4878609   | LOC781502 | 1064    | 0.24891272 |
| BovineHD0600001287 | 6 | 0.000417167 | 4880955   | 4877795   | 4878609   | LOC781502 | 2346    | 0.24891272 |
| BovineHD0600001323 | 6 | 0.000427537 | 5028589   | 4877795   | 4878609   | LOC781502 | 149980  | 0.24703465 |

|                       |    |             |           |           |           |           |         |            |
|-----------------------|----|-------------|-----------|-----------|-----------|-----------|---------|------------|
| BovineHD0600001307    | 6  | 0.000480994 | 4950064   | 4877795   | 4878609   | LOC781502 | 71455   | 0.24778269 |
| BovineHD0600001346    | 6  | 0.000483908 | 5118327   | 4877795   | 4878609   | LOC781502 | 239718  | 0.2432862  |
| BovineHD0600001252    | 6  | 0.00048459  | 4786967   | 4877795   | 4878609   | LOC781502 | 90828   | 0.28479981 |
| BovineHD0600001283    | 6  | 0.000609964 | 4862921   | 4877795   | 4878609   | LOC781502 | 14874   | 0.23528889 |
| BovineHD0600018463    | 6  | 0.000631398 | 66900340  | 66889759  | 66903728  | LOC783045 | 0       | 0.52026004 |
| BovineHD0600018464    | 6  | 0.000631398 | 66905294  | 66889759  | 66903728  | LOC783045 | 1566    | 0.52026004 |
| BovineHD0600030754    | 6  | 0.000726491 | 109103808 | 108969761 | 109535426 | LOC618257 | 0       | 0.34737772 |
| BTB-01468045          | 6  | 0.000873384 | 4890621   | 4877795   | 4878609   | LOC781502 | 12012   | 0.23663504 |
| BovineHD0800024082    | 8  | 0.000269499 | 80798022  | 80695448  | 80787550  | LOC507997 | 10472   | 0.26655872 |
| BovineHD0800030808    | 8  | 0.000326968 | 103619063 | 103229817 | 103621036 | MGC142400 | 0       | 0.33400897 |
| BovineHD4100007083    | 8  | 0.000704729 | 101183356 | 101412889 | 101597077 | LOC508100 | 229533  | 0.29791281 |
| BovineHD0800022737    | 8  | 0.000947254 | 75877341  | 76046898  | 76060032  | LOC786296 | 169557  | 0.27020818 |
| BovineHD0800022738    | 8  | 0.000947254 | 75879724  | 76046898  | 76060032  | LOC786296 | 167174  | 0.27020818 |
| BovineHD0900021870    | 9  | 0.000333714 | 78450681  | 78466302  | 78648155  | LOC535975 | 15621   | 0.55899512 |
| BovineHD0900021873    | 9  | 0.000333714 | 78460717  | 78466302  | 78648155  | LOC535975 | 5585    | 0.55899512 |
| BovineHD0900021519    | 9  | 0.000683699 | 77116439  | 77299958  | 77310361  | LOC784274 | 183519  | 0.47329351 |
| BovineHD0900009688    | 9  | 0.000710144 | 35336469  | 35162428  | 35359069  | LOC537689 | 0       | 0.46525829 |
| BovineHD1000005571    | 10 | 0.00019783  | 16685022  | 16672316  | 16776886  | LOC508410 | 0       | 0.31028475 |
| BovineHD1000005638    | 10 | 0.00019783  | 16834411  | 16791129  | 16837051  | MGC139427 | 0       | 0.51659603 |
| BovineHD1000002260    | 10 | 0.000350639 | 7207952   | 7128443   | 7226417   | LOC539768 | 0       | 1.23652675 |
| Hapmap39767-BTA-63294 | 10 | 0.00037571  | 30654569  | 30600612  | 30803314  | LOC617063 | 0       | 0.38122442 |
| BovineHD1000029182    | 10 | 0.000619578 | 100772117 | 94585861  | 94643745  | LOC533428 | 6128372 | 0.41819838 |
| BovineHD1000023140    | 10 | 0.00076399  | 81131563  | 81137445  | 81159399  | LOC617628 | 5882    | 0.37735876 |
| BovineHD1000023141    | 10 | 0.00076399  | 81132594  | 81137445  | 81159399  | LOC617628 | 4851    | 0.37735876 |
| BovineHD1000023142    | 10 | 0.00076399  | 81133702  | 81137445  | 81159399  | LOC617628 | 3743    | 0.37735876 |
| BovineHD1000008624    | 10 | 0.000954955 | 26468761  | 26451800  | 26722858  | HH114     | 0       | 0.4116412  |
| BovineHD1000008650    | 10 | 0.000954955 | 26519045  | 26451800  | 26722858  | HH114     | 0       | 0.4116412  |
| BovineHD1000009301    | 10 | 0.000954955 | 28413506  | 28387367  | 28468041  | LOC533125 | 0       | 0.32948674 |
| BovineHD1000009304    | 10 | 0.000954955 | 28418396  | 28387367  | 28468041  | LOC533125 | 0       | 0.32948674 |
| BovineHD1100031338    | 11 | 0.000404039 | 92286220  | 92208323  | 92425849  | PBX3      | 0       | 0.3819536  |
| BovineHD1100027434    | 11 | 0.000490874 | 94182089  | 94165415  | 94198257  | LOC515820 | 0       | 0.50452195 |
| BovineHD1100022797    | 11 | 0.000512469 | 79514927  | 79212034  | 79212441  | LOC788469 | 302486  | 0.31672341 |

|                    |    |             |          |          |          |           |         |            |
|--------------------|----|-------------|----------|----------|----------|-----------|---------|------------|
| BovineHD1100011491 | 11 | 0.000737326 | 38860380 | 37968698 | 38191537 | LOC525800 | 668843  | 0.28313536 |
| BovineHD1200018816 | 12 | 0.000424672 | 68721674 | 68443285 | 68494734 | LOC538566 | 226940  | 0.39241576 |
| BovineHD1200004537 | 12 | 0.000751952 | 15247033 | 15244333 | 15357275 | LOC508840 | 0       | 0.34226314 |
| BovineHD1200007215 | 12 | 0.000782888 | 24070715 | 24101505 | 24233430 | LOC533890 | 30790   | 0.23182592 |
| ARS-BFGL-NGS-36799 | 12 | 0.000913098 | 79520461 | 77618072 | 77618991 | LOC787906 | 1901470 | 0.37091713 |
| BovineHD1300002685 | 13 | 0.000702645 | 9970486  | 9921052  | 9979013  | LOC526505 | 0       | 0.29914535 |
| BovineHD4100011476 | 14 | 0.000340333 | 38171740 | 38227426 | 38386079 | LOC511188 | 55686   | 0.36247679 |
| BovineHD1400013624 | 14 | 0.000472124 | 48104263 | 48079258 | 48176545 | EIF3S3    | 0       | 0.30824796 |
| BovineHD1400014338 | 14 | 0.000497694 | 50489929 | 50445561 | 50452815 | LOC781182 | 37114   | 0.26866419 |
| BovineHD1400014341 | 14 | 0.000497694 | 50493823 | 50445561 | 50452815 | LOC781182 | 41008   | 0.26866419 |
| BovineHD1400014343 | 14 | 0.000497694 | 50497256 | 50445561 | 50452815 | LOC781182 | 44441   | 0.26849354 |
| BovineHD1400022883 | 14 | 0.000570681 | 80933921 | 80741670 | 81112887 | LOC617927 | 0       | 0.35530945 |
| ARS-BFGL-NGS-1112  | 14 | 0.000615325 | 54947391 | 55293517 | 55299467 | LOC782496 | 346126  | 0.32763817 |
| BovineHD1400015417 | 14 | 0.000615325 | 54972951 | 55293517 | 55299467 | LOC782496 | 320566  | 0.32811732 |
| BovineHD1400005806 | 14 | 0.000631398 | 20350148 | 20360393 | 20407780 | ATP6V1H   | 10245   | 1.38370339 |
| BovineHD1500025112 | 15 | 0.000110123 | 30464452 | 30006009 | 30571447 | LOC534321 | 0       | 0.23577422 |
| BovineHD1500008148 | 15 | 0.000376049 | 30555737 | 30006009 | 30571447 | LOC534321 | 0       | 0.2117454  |
| BovineHD1500012964 | 15 | 0.00043358  | 45961747 | 45963749 | 45979275 | LOC511036 | 2002    | 0.28426431 |
| BovineHD1500008192 | 15 | 0.000499131 | 30675586 | 30703845 | 30753373 | LOC784497 | 28259   | 0.20571471 |
| BovineHD1500003179 | 15 | 0.000631398 | 12498678 | 12637125 | 12637418 | LOC782283 | 138447  | 0.17360285 |
| BovineHD1500019998 | 15 | 0.00082709  | 69258036 | 69419238 | 69447810 | API5      | 161202  | 0.22216474 |
| BovineHD1600023671 | 16 | 0.000603411 | 80981424 | 72823891 | 72834138 | LOC509797 | 8147286 | 0.21033945 |
| BTB-02009238       | 17 | 4.56E-05    | 918620   | 1049369  | 1405008  | LOC616468 | 130749  | 0.48671964 |
| BovineHD1700000459 | 17 | 0.000138671 | 2065041  | 2131651  | 2135998  | LOC783481 | 66610   | 0.40856661 |
| BTB-01990000       | 17 | 0.000228236 | 3500450  | 3641911  | 3650486  | SFRP2     | 141461  | 0.39615297 |
| BovineHD4100012800 | 17 | 0.000325901 | 1958246  | 2131651  | 2135998  | LOC783481 | 173405  | 0.33774253 |
| BovineHD1700000417 | 17 | 0.000337226 | 1808282  | 1645974  | 1650185  | NPY2R     | 158097  | 0.3751305  |
| BovineHD1700000436 | 17 | 0.000359047 | 1928510  | 2131651  | 2135998  | LOC783481 | 203141  | 0.32729816 |
| BovineHD1700000826 | 17 | 0.000360119 | 3493111  | 3641911  | 3650486  | SFRP2     | 148800  | 0.34545076 |
| BovineHD1700000440 | 17 | 0.000381151 | 1945939  | 2131651  | 2135998  | LOC783481 | 185712  | 0.33028105 |
| BovineHD1700001861 | 17 | 0.000389319 | 6479238  | 6624466  | 6673982  | LOC510523 | 145228  | 0.39676254 |
| BovineHD1700001862 | 17 | 0.000389319 | 6484864  | 6624466  | 6673982  | LOC510523 | 139602  | 0.39817571 |

|                       |    |             |          |          |          |           |         |            |
|-----------------------|----|-------------|----------|----------|----------|-----------|---------|------------|
| BovineHD1700000480    | 17 | 0.000472282 | 2162163  | 2131651  | 2135998  | LOC783481 | 26165   | 0.37435383 |
| BovineHD1700000828    | 17 | 0.000482351 | 3503264  | 3641911  | 3650486  | SFRP2     | 138647  | 0.3352939  |
| BovineHD1700000437    | 17 | 0.000493478 | 1938491  | 2131651  | 2135998  | LOC783481 | 193160  | 0.31606679 |
| BovineHD1700000438    | 17 | 0.000493478 | 1942284  | 2131651  | 2135998  | LOC783481 | 189367  | 0.31606679 |
| BovineHD1700000838    | 17 | 0.000550955 | 3570034  | 3641911  | 3650486  | SFRP2     | 71877   | 0.32510132 |
| BovineHD1700000929    | 17 | 0.000808965 | 3923694  | 3809376  | 3979377  | LOC505156 | 0       | 0.28092928 |
| BovineHD1700000867    | 17 | 0.000985681 | 3656789  | 3641911  | 3650486  | SFRP2     | 6303    | 0.34373579 |
| BovineHD1800007657    | 18 | 0.000469956 | 24828404 | 24677620 | 24857607 | GNAO1     | 0       | 0.27716084 |
| Hapmap50690-BTA-43010 | 18 | 0.000534397 | 33447591 | 33304374 | 33489759 | LOC534015 | 0       | 0.28695125 |
| BovineHD1800015971    | 18 | 0.000714334 | 54463089 | 54476349 | 54489358 | LOC618283 | 13260   | 0.23237778 |
| BovineHD1800006939    | 18 | 0.000945079 | 22601714 | 22533379 | 22616608 | LOC533968 | 0       | 0.25100773 |
| BovineHD1900002935    | 19 | 0.000359983 | 10769399 | 10791768 | 10819370 | LOC615857 | 22369   | 0.33481895 |
| BovineHD1900018660    | 19 | 0.000740304 | 9006976  | 8974082  | 9194966  | LOC537257 | 0       | 0.32631358 |
| BovineHD1900004151    | 19 | 0.000897328 | 15378713 | 15371145 | 15745690 | MGC137743 | 0       | 0.24876167 |
| BovineHD1900015991    | 19 | 0.000925217 | 56554454 | 56555450 | 56562684 | LOC525463 | 996     | 0.29488548 |
| BovineHD2000003535    | 20 | 7.17E-06    | 11089453 | 11002687 | 11017134 | CD180     | 72319   | 0.72924832 |
| BovineHD2000003316    | 20 | 1.33E-05    | 10500175 | 10503094 | 10550535 | OCLN      | 2919    | 0.81077297 |
| BovineHD2000020358    | 20 | 1.45E-05    | 69755152 | 68339491 | 68341793 | LOC619163 | 1413359 | 0.52441889 |
| BovineHD2000003303    | 20 | 3.59E-05    | 10462408 | 10476144 | 10497539 | MGC133741 | 13736   | 0.72010269 |
| BovineHD2000003308    | 20 | 3.59E-05    | 10486199 | 10476144 | 10497539 | MGC133741 | 0       | 0.72010269 |
| BovineHD2000001686    | 20 | 5.85E-05    | 5390176  | 5413657  | 5439737  | GABRP     | 23481   | 0.52534235 |
| BovineHD2000001695    | 20 | 5.85E-05    | 5418160  | 5413657  | 5439737  | GABRP     | 0       | 0.52534235 |
| BovineHD2000003531    | 20 | 9.81E-05    | 11083847 | 11002687 | 11017134 | CD180     | 66713   | 0.66373206 |
| BovineHD2000000653    | 20 | 0.000101377 | 1876553  | 1900624  | 1909963  | LOC781299 | 24071   | 0.48340247 |
| BovineHD2000003558    | 20 | 0.000105243 | 11157742 | 11002687 | 11017134 | CD180     | 140608  | 0.45719405 |
| BovineHD2000003685    | 20 | 0.000113173 | 11428343 | 11621160 | 11622355 | LOC783613 | 192817  | 0.50710441 |
| BovineHD2000001689    | 20 | 0.000144961 | 5395165  | 5413657  | 5439737  | GABRP     | 18492   | 0.43718369 |
| BovineHD2000003542    | 20 | 0.000151284 | 11110154 | 11002687 | 11017134 | CD180     | 93020   | 0.43967428 |
| BovineHD2000012369    | 20 | 0.000165699 | 43368589 | 43349315 | 43370051 | LOC539509 | 0       | 0.42931236 |
| BovineHD2000004874    | 20 | 0.000169182 | 16235118 | 15126146 | 16793347 | LOC539556 | 0       | 0.35263904 |
| BovineHD2000004891    | 20 | 0.000169182 | 16273471 | 15126146 | 16793347 | LOC539556 | 0       | 0.35263904 |
| BovineHD2000003569    | 20 | 0.000183036 | 11180923 | 11002687 | 11017134 | CD180     | 163789  | 0.51413072 |

|                    |    |             |          |          |          |           |         |            |
|--------------------|----|-------------|----------|----------|----------|-----------|---------|------------|
| BovineHD2000002810 | 20 | 0.000202689 | 8946187  | 8796034  | 8838048  | LOC527467 | 108139  | 0.41695926 |
| BovineHD2000003075 | 20 | 0.000213877 | 9730764  | 9746387  | 9778197  | PTCD2     | 15623   | 0.35814046 |
| BovineHD2000003295 | 20 | 0.00022068  | 10413117 | 10382526 | 10410258 | SMN1      | 2859    | 0.55389462 |
| BovineHD2000003357 | 20 | 0.000240435 | 10580238 | 10594087 | 10635313 | LOC541110 | 13849   | 0.40684168 |
| BovineHD2000000659 | 20 | 0.000252299 | 1882638  | 1900624  | 1909963  | LOC781299 | 17986   | 0.38925014 |
| BovineHD2000002756 | 20 | 0.000287564 | 8703472  | 8721996  | 8784387  | LOC519307 | 18524   | 0.43917096 |
| ARS-BFGL-NGS-77784 | 20 | 0.000322267 | 66862841 | 67394965 | 67428583 | LOC527659 | 532124  | 0.58297347 |
| BovineHD2000002556 | 20 | 0.00035258  | 8018916  | 7718973  | 7790754  | MGC139744 | 228162  | 0.35437335 |
| BovineHD2000011971 | 20 | 0.000392638 | 41709705 | 41698936 | 41699573 | LOC504862 | 10132   | 0.31168918 |
| BovineHD2000003666 | 20 | 0.000393656 | 11383301 | 11621160 | 11622355 | LOC783613 | 237859  | 0.40767623 |
| BovineHD2000020111 | 20 | 0.000406423 | 69057382 | 68339491 | 68341793 | LOC619163 | 715589  | 0.42598636 |
| BovineHD2000020361 | 20 | 0.000466827 | 69768129 | 68339491 | 68341793 | LOC619163 | 1426336 | 0.29834666 |
| BovineHD4100014908 | 20 | 0.000466827 | 69772518 | 68339491 | 68341793 | LOC619163 | 1430725 | 0.30754755 |
| BovineHD2000013477 | 20 | 0.00048592  | 48216957 | 47907148 | 47907854 | LOC783643 | 309103  | 0.85530092 |
| BovineHD2000003294 | 20 | 0.00049694  | 10407140 | 10382526 | 10410258 | SMN1      | 0       | 0.57585372 |
| BovineHD2000003306 | 20 | 0.00049694  | 10472213 | 10476144 | 10497539 | MGC133741 | 3931    | 0.57585372 |
| BovineHD2000004877 | 20 | 0.000505927 | 16237996 | 15126146 | 16793347 | LOC539556 | 0       | 0.30454493 |
| BovineHD2000004900 | 20 | 0.000505927 | 16285451 | 15126146 | 16793347 | LOC539556 | 0       | 0.30454493 |
| BovineHD2000004903 | 20 | 0.000505927 | 16292260 | 15126146 | 16793347 | LOC539556 | 0       | 0.30454493 |
| BovineHD2000004910 | 20 | 0.000505927 | 16306497 | 15126146 | 16793347 | LOC539556 | 0       | 0.30454493 |
| BovineHD2000004912 | 20 | 0.000505927 | 16308101 | 15126146 | 16793347 | LOC539556 | 0       | 0.30454493 |
| BovineHD2000004991 | 20 | 0.000505927 | 16466445 | 15126146 | 16793347 | LOC539556 | 0       | 0.30936915 |
| BovineHD2000004992 | 20 | 0.000505927 | 16478171 | 16470910 | 16475722 | LOC784699 | 2449    | 0.30936915 |
| BovineHD2000005003 | 20 | 0.000505927 | 16495702 | 15126146 | 16793347 | LOC539556 | 0       | 0.30936915 |
| BovineHD2000005004 | 20 | 0.000505927 | 16497740 | 15126146 | 16793347 | LOC539556 | 0       | 0.30936915 |
| BovineHD2000005018 | 20 | 0.000505927 | 16545907 | 15126146 | 16793347 | LOC539556 | 0       | 0.30936915 |
| BovineHD2000004882 | 20 | 0.000513908 | 16248353 | 15126146 | 16793347 | LOC539556 | 0       | 0.30221378 |
| ARS-BFGL-NGS-60738 | 20 | 0.000515427 | 12752857 | 12749867 | 12796358 | LOC787097 | 0       | 0.39005404 |
| BovineHD2000003646 | 20 | 0.000524165 | 11342271 | 11621160 | 11622355 | LOC783613 | 278889  | 0.35973751 |
| BovineHD2000003647 | 20 | 0.000524165 | 11343307 | 11621160 | 11622355 | LOC783613 | 277853  | 0.3551355  |
| BovineHD2000003501 | 20 | 0.000559617 | 10989293 | 10762638 | 10990083 | LOC529061 | 0       | 0.34919478 |
| BovineHD2000003320 | 20 | 0.000615908 | 10510212 | 10503094 | 10550535 | OCLN      | 0       | 0.43644268 |

|                    |    |             |          |          |          |           |         |            |
|--------------------|----|-------------|----------|----------|----------|-----------|---------|------------|
| BovineHD2000001678 | 20 | 0.000644879 | 5360905  | 5321886  | 5334114  | MGC140092 | 26791   | 0.34390988 |
| BovineHD2000012396 | 20 | 0.000673649 | 43494942 | 43470457 | 43532818 | LOC525869 | 0       | 0.28650036 |
| BovineHD2000004603 | 20 | 0.000686997 | 15230293 | 15126146 | 16793347 | LOC539556 | 0       | 0.30027034 |
| BovineHD2000002009 | 20 | 0.000693739 | 6409306  | 6463181  | 6463549  | LOC783742 | 53875   | 0.41351893 |
| BovineHD2000020369 | 20 | 0.000704119 | 69791421 | 68339491 | 68341793 | LOC619163 | 1449628 | 0.27944577 |
| BovineHD2000002702 | 20 | 0.000711838 | 8430484  | 8494755  | 8500677  | MSX2      | 64271   | 0.35065292 |
| BovineHD2000013071 | 20 | 0.000733988 | 46227077 | 46405477 | 46405632 | LOC786028 | 178400  | 0.29354625 |
| BovineHD2000003181 | 20 | 0.000892212 | 10012090 | 9892591  | 9985887  | MAP1B     | 26203   | 0.32810096 |
| BovineHD2000003563 | 20 | 0.000920736 | 11170115 | 11002687 | 11017134 | CD180     | 152981  | 0.36427615 |
| BovineHD2000013521 | 20 | 0.000924332 | 48516564 | 48602277 | 48692915 | LOC781080 | 85713   | 0.30345551 |
| BovineHD2000002552 | 20 | 0.000928106 | 8003809  | 7718973  | 7790754  | MGC139744 | 213055  | 0.31055464 |
| ARS-BFGL-NGS-58314 | 20 | 0.000940476 | 10871544 | 10762638 | 10990083 | LOC529061 | 0       | 0.38082767 |
| BovineHD2000004232 | 20 | 0.000964994 | 13179181 | 13146497 | 13266025 | LOC511108 | 0       | 0.27697677 |
| BovineHD2000004233 | 20 | 0.000964994 | 13182785 | 13146497 | 13266025 | LOC511108 | 0       | 0.27697677 |
| BovineHD2000004919 | 20 | 0.000977061 | 16322498 | 15126146 | 16793347 | LOC539556 | 0       | 0.2840821  |
| BovineHD2100001044 | 21 | 6.13E-05    | 5654518  | 5647387  | 5687565  | LOC507093 | 0       | 0.49838512 |
| BovineHD2100000990 | 21 | 8.41E-05    | 5493691  | 5226496  | 5458139  | LOC789946 | 35552   | 0.42861557 |
| BovineHD4100014935 | 21 | 8.41E-05    | 5499262  | 5226496  | 5458139  | LOC789946 | 41123   | 0.42861557 |
| BovineHD2100001007 | 21 | 0.000107849 | 5535667  | 5226496  | 5458139  | LOC789946 | 77528   | 0.40786871 |
| BovineHD2100001019 | 21 | 0.000158105 | 5585532  | 5647387  | 5687565  | LOC507093 | 61855   | 0.42516157 |
| BovineHD2100001020 | 21 | 0.000158105 | 5588795  | 5647387  | 5687565  | LOC507093 | 58592   | 0.42516157 |
| BovineHD2100001032 | 21 | 0.000158105 | 5624513  | 5647387  | 5687565  | LOC507093 | 22874   | 0.43213285 |
| BovineHD2100001033 | 21 | 0.000158105 | 5625257  | 5647387  | 5687565  | LOC507093 | 22130   | 0.43213285 |
| BovineHD2100001035 | 21 | 0.000158105 | 5629989  | 5647387  | 5687565  | LOC507093 | 17398   | 0.43213285 |
| BovineHD2100001042 | 21 | 0.000158105 | 5650628  | 5647387  | 5687565  | LOC507093 | 0       | 0.43909629 |
| BovineHD2100001046 | 21 | 0.000158105 | 5656349  | 5647387  | 5687565  | LOC507093 | 0       | 0.43909629 |
| BovineHD2100001180 | 21 | 0.000246691 | 6015796  | 5940934  | 6030652  | CHSY1     | 0       | 0.36867736 |
| BovineHD2100001182 | 21 | 0.000246691 | 6023549  | 5940934  | 6030652  | CHSY1     | 0       | 0.36867736 |
| BovineHD2100001191 | 21 | 0.000246691 | 6038824  | 6061852  | 6070994  | MGC137429 | 23028   | 0.36867736 |
| BovineHD2200014891 | 22 | 2.78E-05    | 52426809 | 52457344 | 52458963 | LOC788085 | 30535   | 0.55362262 |
| BovineHD2200014919 | 22 | 2.90E-05    | 52524448 | 52544750 | 52545227 | LOC614114 | 20302   | 0.55142876 |
| BovineHD2200014912 | 22 | 0.000120222 | 52473934 | 52457344 | 52458963 | LOC788085 | 14971   | 0.45161359 |

|                       |    |             |          |          |          |           |         |            |
|-----------------------|----|-------------|----------|----------|----------|-----------|---------|------------|
| BovineHD2200000952    | 22 | 0.000271161 | 3557386  | 3531543  | 3727195  | LOC614548 | 0       | 0.40028462 |
| BovineHD2200014876    | 22 | 0.000374382 | 52398798 | 52183488 | 52340582 | MGC142412 | 58216   | 0.35833075 |
| ARS-BFGL-NGS-43481    | 22 | 0.000502852 | 57930390 | 57912718 | 57926714 | LOC507939 | 3676    | 0.34614188 |
| BovineHD2200017368    | 22 | 0.000749227 | 59828585 | 59803391 | 59852680 | LOC532521 | 0       | 0.33416194 |
| BovineHD2200013110    | 22 | 0.000913908 | 45326875 | 44995625 | 45282086 | LOC519644 | 44789   | 0.35044706 |
| BovineHD2300001341    | 23 | 0.000100249 | 5584389  | 5474689  | 5585785  | LOC618855 | 0       | 0.42876264 |
| BovineHD2300000776    | 23 | 0.000663904 | 3588320  | 3587189  | 3684384  | LOC790110 | 0       | 0.25881084 |
| BovineHD2300000777    | 23 | 0.000663904 | 3589476  | 3587189  | 3684384  | LOC790110 | 0       | 0.25881084 |
| BovineHD2300009607    | 23 | 0.00075485  | 32952316 | 32896314 | 33039963 | LOC541284 | 0       | 0.23546628 |
| BovineHD2400000873    | 24 | 3.75E-06    | 3255562  | 3239715  | 3244309  | LOC521016 | 11253   | 0.5145984  |
| BovineHD2400000876    | 24 | 3.75E-06    | 3262266  | 3239715  | 3244309  | LOC521016 | 17957   | 0.5145984  |
| BovineHD2400000883    | 24 | 6.54E-06    | 3281562  | 3239715  | 3244309  | LOC521016 | 37253   | 0.49749457 |
| BovineHD2400000886    | 24 | 6.54E-06    | 3302265  | 3239715  | 3244309  | LOC521016 | 57956   | 0.49379264 |
| ARS-BFGL-NGS-2531     | 24 | 5.81E-05    | 6183550  | 6015554  | 6254293  | LOC790283 | 0       | 0.38968642 |
| BovineHD2400000884    | 24 | 0.000171206 | 3292241  | 3239715  | 3244309  | LOC521016 | 47932   | 0.34110758 |
| BovineHD2400001238    | 24 | 0.000424767 | 4557059  | 4196312  | 4197792  | LOC790254 | 359267  | 0.38800988 |
| BovineHD2400006511    | 24 | 0.00058046  | 23848246 | 23903763 | 23976801 | LOC507330 | 55517   | 0.34321866 |
| BovineHD2400006508    | 24 | 0.000607853 | 23835665 | 23903763 | 23976801 | LOC507330 | 68098   | 0.32200992 |
| BovineHD2400017460    | 24 | 0.000777015 | 60413692 | 59897148 | 60006017 | LOC525095 | 407675  | 0.31067791 |
| BovineHD2400000921    | 24 | 0.000792797 | 3423617  | 3239715  | 3244309  | LOC521016 | 179308  | 0.32973748 |
| BovineHD2400018086    | 24 | 0.000882375 | 62205149 | 59897148 | 60006017 | LOC525095 | 2199132 | 0.344237   |
| BovineHD2400000657    | 24 | 0.000954347 | 2494457  | 2314638  | 2315434  | LOC790035 | 179023  | 0.33396854 |
| BovineHD2500011602    | 25 | 0.000647696 | 41106700 | 40897073 | 41496081 | LOC516333 | 0       | 0.28937045 |
| BovineHD2500010718    | 25 | 0.000758467 | 38464228 | 38451075 | 38473460 | LOC538021 | 0       | 0.30647207 |
| BovineHD2600009937    | 26 | 0.00075179  | 36372215 | 36143857 | 36406716 | GPRK5     | 0       | 0.25295395 |
| Hapmap44556-BTA-66734 | 27 | 0.000370635 | 22839206 | 22890021 | 22931823 | LOC533821 | 50815   | 0.44710828 |
| BovineHD2700005738    | 27 | 0.000591605 | 20164451 | 20360948 | 20618283 | LOC784004 | 196497  | 0.2952349  |
| BovineHD2700005994    | 27 | 0.000631375 | 21036240 | 21163084 | 21163921 | LOC784180 | 126844  | 0.27801391 |
| BovineHD2700005733    | 27 | 0.000710631 | 20140892 | 20360948 | 20618283 | LOC784004 | 220056  | 0.28383906 |
| BovineHD2700005925    | 27 | 0.000807663 | 20828955 | 20360948 | 20618283 | LOC784004 | 210672  | 0.28352069 |
| BovineHD2700003135    | 27 | 0.000821496 | 10486904 | 10972158 | 11044957 | LOC784124 | 485254  | 0.22951597 |
| BovineHD2700005734    | 27 | 0.000848824 | 20142691 | 20360948 | 20618283 | LOC784004 | 218257  | 0.27588243 |



|                     |    |             |           |          |          |           |          |            |
|---------------------|----|-------------|-----------|----------|----------|-----------|----------|------------|
| BTB-00982394        | 28 | 2.53E-05    | 24007807  | 23906631 | 24062648 | LOC613849 | 0        | 1.83580866 |
| BovineHD2800002008  | 28 | 0.000881873 | 6747420   | 6730542  | 6738364  | LOC782106 | 9056     | 0.22813555 |
| ARS-BFGL-NGS-105175 | 30 | 2.53E-05    | 71351341  | 71167036 | 71170431 | LOC523373 | 180910   | 0.26267465 |
| BovineHD3000040166  | 30 | 0.000155305 | 139521609 | 0        | 0        | 0         | 0        | 0.20586443 |
| BovineHD3000040251  | 30 | 0.000155305 | 139803080 | 0        | 0        | 0         | 0        | 0.20586443 |
| BovineHD3000046712  | 30 | 0.000159023 | 67406152  | 67507986 | 67513052 | LOC785265 | 101834   | 0.21077926 |
| BovineHD3000046047  | 30 | 0.000842552 | 12182908  | 12876359 | 12882264 | LOC541035 | 693451   | 0.16934995 |
| BovineHD3000034585  | 30 | 0.000886587 | 122605732 | 99863691 | 99873236 | LOC529792 | 22732496 | 0.12310371 |
| BovineHD3000034589  | 30 | 0.000886587 | 122616708 | 99863691 | 99873236 | LOC529792 | 22743472 | 0.12310371 |
| BovineHD3000005757  | 30 | 0.00095246  | 17365729  | 17592723 | 17602162 | LOC530936 | 226994   | 0.14386876 |
| BovineHD3000005758  | 30 | 0.00095246  | 17375211  | 17592723 | 17602162 | LOC530936 | 217512   | 0.14386876 |
