# Supplementary material for: Multi-Trait GWAS and New Candidate Genes Annotation for Growth Curve Parameters in Brahman Cattle
Source: PubMed Central journal article supplement (PMC4622042; doi:10.1371/journal.pone.0139906), 2015-10-07
Supplement: pone.0139906.s008.pdf [file pone.0139906.s008.pdf]

**S3 Table. Blocks formed by linkage disequilibrium among the 167 significant SNPs for A (mature weight) and 262 significant SNPs for K (maturity rate). %var: additive genetic variance explained by blocks (%).**

| Trait | Haplotypes    | SNPs | Chr | Position           | Nearest Gene                  | %Var |
|-------|---------------|------|-----|--------------------|-------------------------------|------|
| A     | Haplotypes 1  | 2    | 8   | 14927629-15022993  | MGC133601                     | 1.32 |
|       | Haplotypes 2  | 3    | 16  | 76187883-76200952  | LOC509797                     | 1.51 |
|       | Haplotypes 3  | 5    | 19  | 59614413-59745154  | LOC787823                     | 2.37 |
|       | Haplotypes 4  | 2    | 27  | 41551568-41618491  | LOC784356                     | 0.80 |
|       | Haplotypes 5  | 2    | X   | 65152485-65221973  | LOC784159                     | 0.44 |
| K     | Haplotypes 1  | 6    | 1   | 29098485-119188091 | LOC781270                     | 1.94 |
|       | Haplotypes 2  | 2    | 2   | 94542687-94557690  | LOC782360                     | 0.49 |
|       | Haplotypes 3  | 2    | 3   | 37226889-37411646  | LOC787616                     | 0.65 |
|       | Haplotypes 4  | 8    | 4   | 18168180-117064985 | LOC512582,LOC788066,LOC614377 | 2.49 |
|       | Haplotypes 5  | 3    | 5   | 69831255-69885003  | MGC137188                     | 0.97 |
|       | Haplotypes 6  | 2    | 6   | 5028589-5065951    | LOC781502                     | 0.50 |
|       | Haplotypes 7  | 2    | 6   | 49942445-66900340  | LOC783045                     | 0.92 |
|       | Haplotypes 8  | 2    | 11  | 79514927-94182089  | LOC515820                     | 0.82 |
|       | Haplotypes 9  | 2    | 14  | 50493823-50497256  | LOC781182                     | 0.54 |
|       | Haplotypes 10 | 2    | 18  | 24828404-54463089  | GNAO1                         | 0.51 |
|       | Haplotypes 11 | 3    | 20  | 9778197-10410258   | PTCD2,SMN1,MAP1B              | 1.26 |
|       | Haplotypes 12 | 2    | 20  | 10871544-12752857  | LOC787097                     | 0.77 |
|       | Haplotypes 13 | 3    | 20  | 16308101-16466445  | LOC539556                     | 0.90 |
|       | Haplotypes 14 | 4    | 21  | 5656349-6038824    | CHSY1,MGC137429               | 1.55 |
|       | Haplotypes 15 | 3    | 22  | 3557386-52398798   | LOC519644,MGC142412           | 1.11 |
|       | Haplotypes 16 | 2    | 22  | 52473934-52524448  | LOC788085,LOC614114           | 1.00 |
|       | Haplotypes 17 | 2    | 23  | 3588320-3589476    | LOC790110                     | 0.52 |
|       | Haplotypes 18 | 2    | 24  | 23835665-23848246  | LOC507330                     | 0.67 |
|       | Haplotypes 19 | 2    | 27  | 21036240-22839206  | LOC784180                     | 0.73 |
