# Supplementary material for: Multi-Trait GWAS and New Candidate Genes Annotation for Growth Curve Parameters in Brahman Cattle
Source: PubMed Central journal article supplement (PMC4622042; doi:10.1371/journal.pone.0139906), 2015-10-07
Supplement: pone.0139906.s009.pdf [file pone.0139906.s009.pdf]

**S4 Table. Comparison between four nonlinear growth models (Gompertz, Logistic, Brody and von Bertalanffy) using different covariance matrix structures (diagonal, corAR1, corCAR1, corARMA1. Estimates for growth curve parameters: mature weight (A), scale (b) and maturity rate (K). Goodness of fit measures: LOGLIK, Akaike Information Criterion (AIC) and Bayesian Information Criterion (BIC), using *nlme* function by R software.**

|                 |        | Diagonal covariance matrix |               |                |                 |
|-----------------|--------|----------------------------|---------------|----------------|-----------------|
|                 |        | Gompertz                   | Logistic      | Brody          | von Bertalanffy |
| Parameters      | A      | 419.90(51.44)              | 399.85(42.67) | 520.32(163.72) | 373.86(36.26)   |
|                 | b      | 2.00(0.12)                 | 4.85(0.64)    | 0.92(0.02)     | 0.75(0.04)      |
|                 | k      | 0.13(0.03)                 | 0.20(0.04)    | 0.06(0.02)     | 0.08(0.02)      |
| Goodness of fit | LOGLIK | -36376.34                  | -37239.25     | -35127.27      | -40026.96       |
|                 | AIC    | 72772.69                   | 74498.51      | 70274.55       | 80073.91        |
|                 | BIC    | 72841.95                   | 74567.77      | 70343.81       | 80143.18        |

|                 |        | Structured covariance matrix (corAR1) |              |       |                 |
|-----------------|--------|---------------------------------------|--------------|-------|-----------------|
|                 |        | Gompertz                              | Logistic     | Brody | von Bertalanffy |
| Parameters      | A      | *                                     | 415.75(3.19) | *     | 370.27(2.83)    |
|                 | b      | *                                     | 4.31(0.26)   | *     | 0.69(5.68e-06)  |
|                 | k      | *                                     | 0.17(0.46)   | *     | 0.08(8.87e-07)  |
| Goodness of fit | LOGLIK | *                                     | -36541.81    | *     | -39335.06       |
|                 | AIC    | *                                     | 73105.62     | *     | 78692.12        |
|                 | BIC    | *                                     | 73181.81     | *     | 78768.31        |

|                 |        | Structured covariance matrix (corCAR1) |                   |                  |                 |
|-----------------|--------|----------------------------------------|-------------------|------------------|-----------------|
|                 |        | Gompertz                               | Logistic          | Brody            | von Bertalanffy |
| Parameters      | A      | 409.44(3.05e+01)                       | 394.85 (2.81e+01) | 471.24(3.68e+01) | 374.291.69e+01) |
|                 | b      | 1.98(4.24e-05)                         | 4.65 (1.14e-04)   | 0.91(7.24e-07)   | 0.73(9.64e-06)  |
|                 | k      | 0.13(1.12e-08)                         | 0.19(3.41e-06)    | 0.06(2.82e-06)   | 0.08(8.90e-07)  |
| Goodness of fit | LOGLIK | -36376.34                              | -37239.25         | -35127.27        | -40026.96       |
|                 | AIC    | 72774.69                               | 74500.51          | 70276.55         | 80075.91        |
|                 | BIC    | 72850.88                               | 74576.7           | 70352.74         | 80152.11        |

|  |  | Structured covariance matrix (corARMA1) |  |  |  |
|--|--|-----------------------------------------|--|--|--|
|--|--|-----------------------------------------|--|--|--|

|                 |        | Gompertz      | Logistic         | Brody | von Bertalanffy  |
|-----------------|--------|---------------|------------------|-------|------------------|
| Parameters      | A      | 451.65(46.07) | 419.27(3.59e+01) | *     | 366.72(3.10e+01) |
|                 | b      | 1.90(0.14)    | 4.27(6.36e-01)   | *     | 0.69(4.13e-06)   |
|                 | k      | 0.11(0.01)    | 0.16(3.61e-06)   | *     | 0.08(3.27e-07)   |
| Goodness of fit | LOGLIK | -35704.57     | -36352.8         | *     | -39013.37        |
|                 | AIC    | 71433.13      | 72729.61         | *     | 78050.73         |
|                 | BIC    | 71516.25      | 72812.73         | *     | 78133.85         |
